# Supplementary material for: Application of an Optimized HPLC Method for the Detection of Various Phenolic Compounds in Apples from Lithuanian Cultivars
Source: Hindawi journal article supplement (doi:10.1155/2014/542121), 2014-01-01
Supplement: f1 [file 542121.f1.pdf]

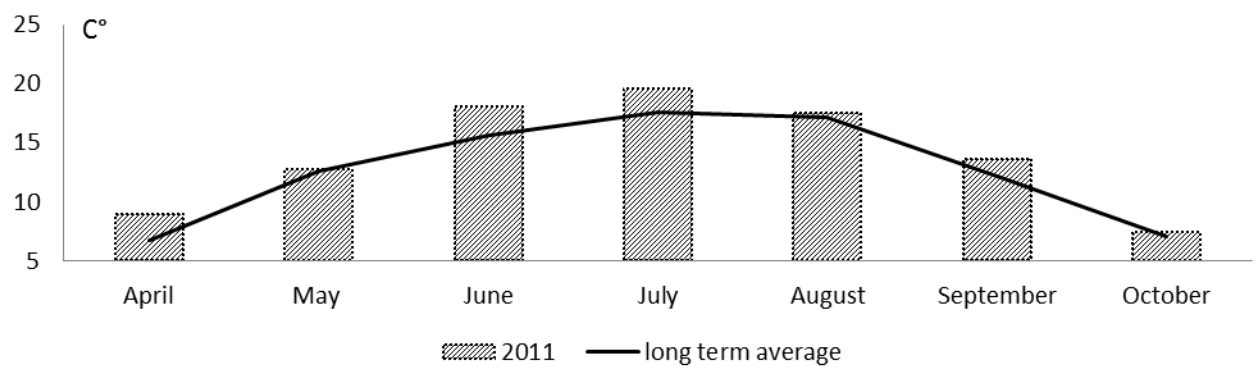

FIGURE S1: Temperature changes during the vegetation period

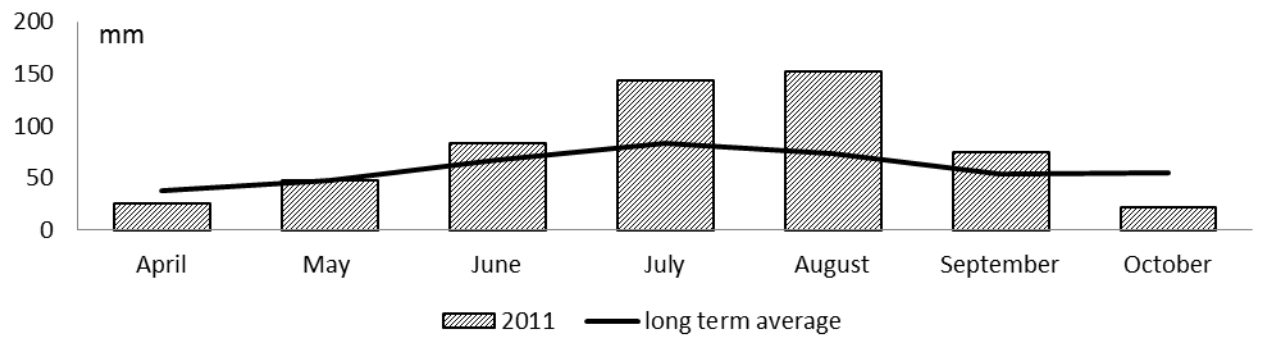

FIGURE S2: Precipitation during the vegetation period

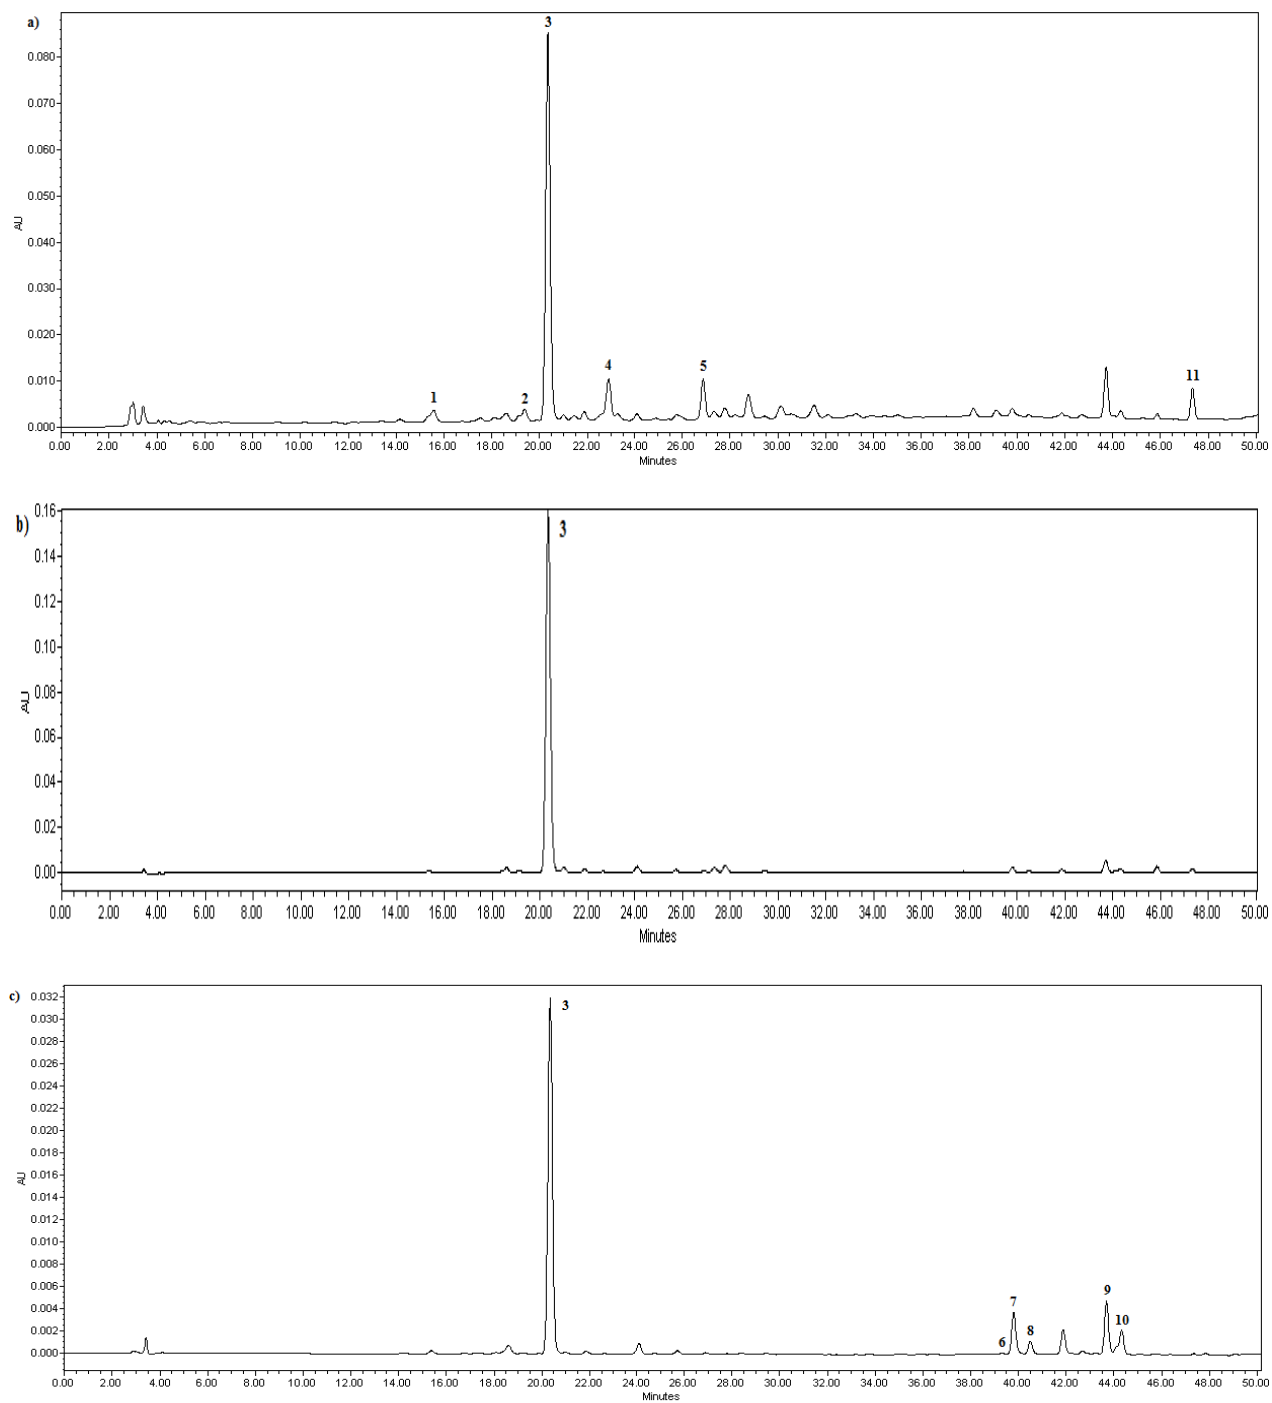

FIGURE S3: Chromatograms of ethanol extracts of the investigated apple samples (cv. 'Auksis'). a)  $\lambda=280$  nm; b)  $\lambda=320$  nm; c)  $\lambda=360$  nm.

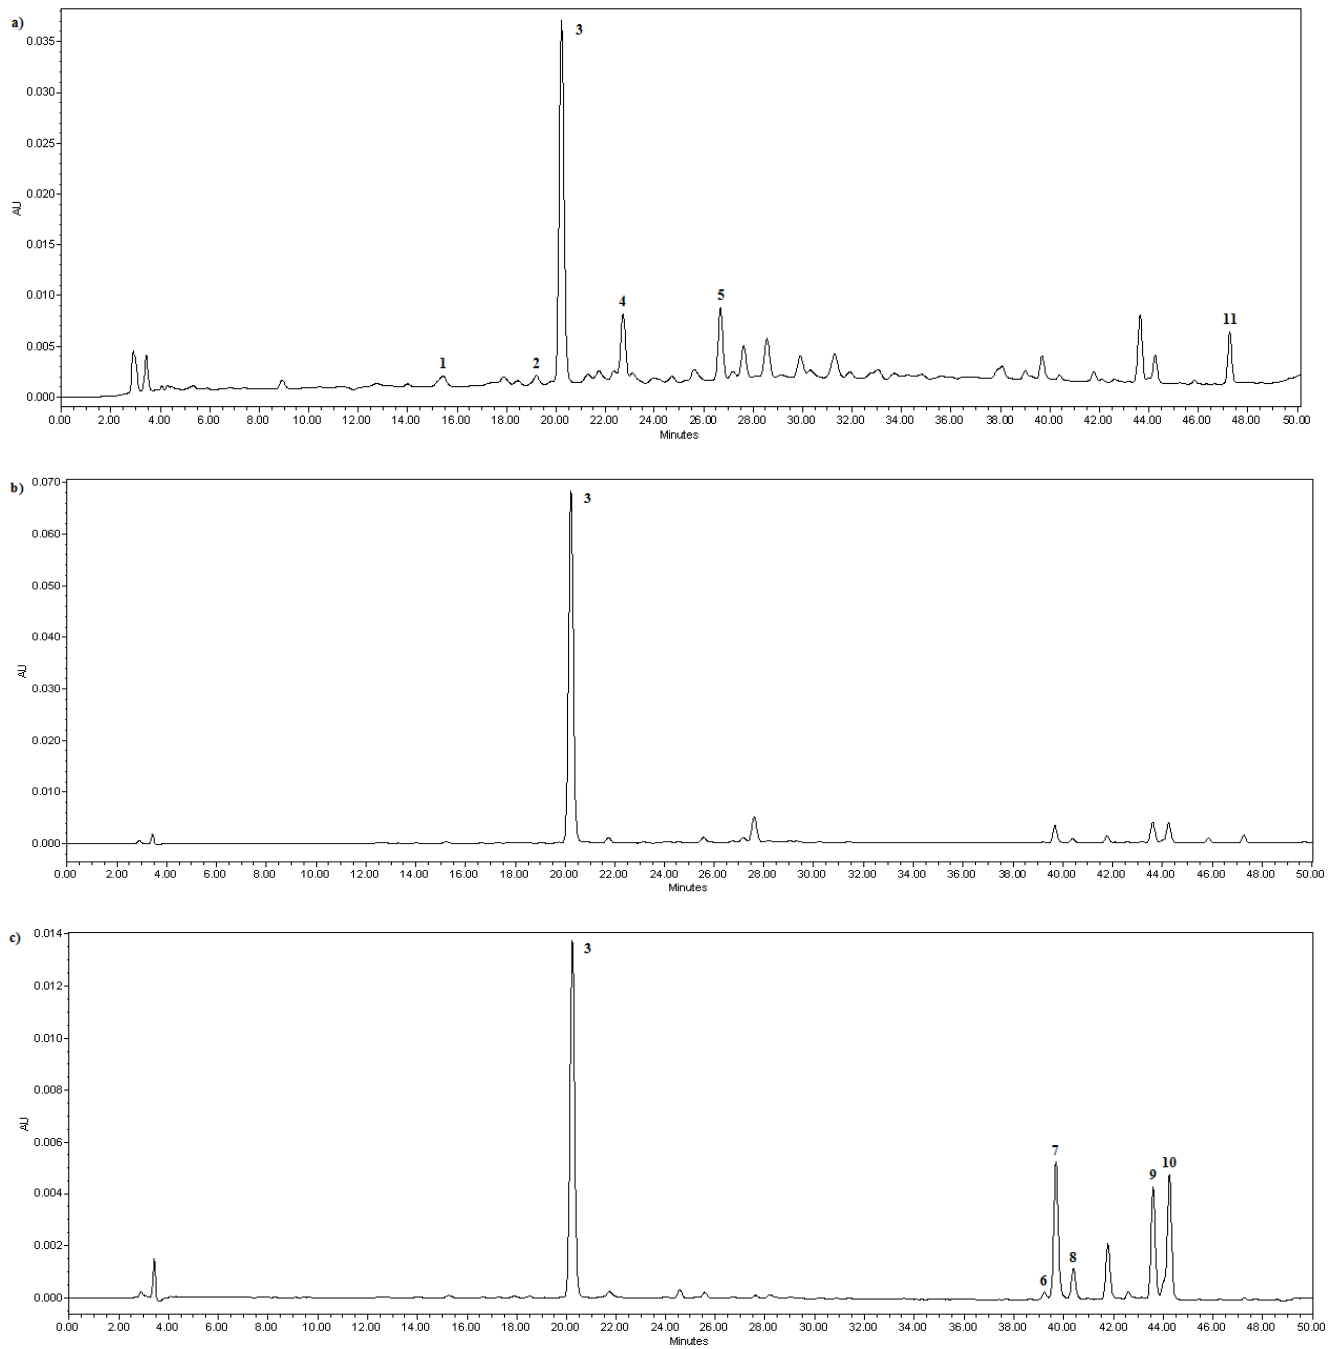

FIGURE S4: Chromatograms of ethanol extracts of the investigated apple samples (cv. 'Ligol'). a)  $\lambda=280$  nm; b)  $\lambda=320$  nm; c)  $\lambda=360$  nm.

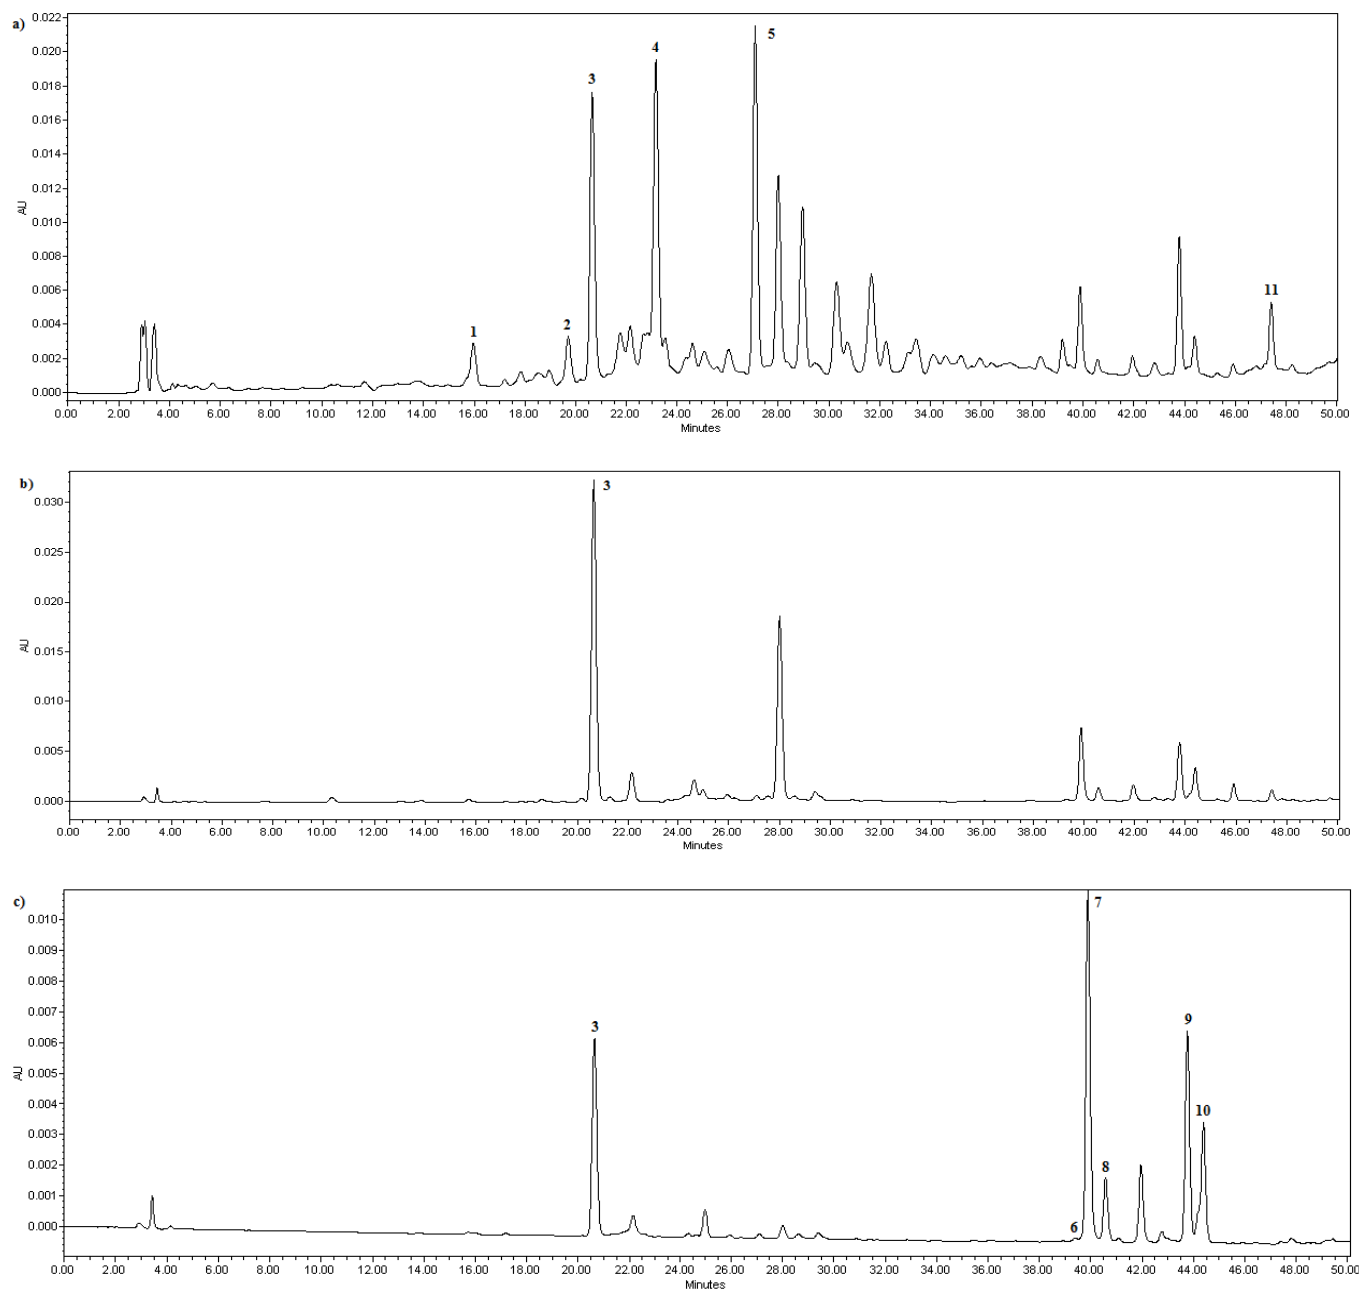

FIGURE S5: Chromatograms of ethanol extracts of the investigated apple samples (cv. 'Šampion').

a)  $\lambda=280$  nm; b)  $\lambda=320$  nm; c)  $\lambda=360$  nm.
